# Supplementary material for: High Level of METTL7B Indicates Poor Prognosis of Patients and Is Related to Immunity in Glioma
Source: Front Oncol. 2021 Apr 29;11:650534. doi: 10.3389/fonc.2021.650534 (PMC8117938; doi:10.3389/fonc.2021.650534)
Supplement: Supplementary file 6 [file Table_1.xlsx]

## Sheet: The top 200 different genes
CGGA-gene	TCGA-gene
NSG2	SFRP2
SMOC1	SMOC1
DLL3	TNR
CPLX2	NSG2
TNR	INA
SHD	DLL3
ETNPPL	CRTAC1
GRIN1	GALNT13
CXXC11	SHD
JPH3	ZDHHC22
INA	RTP5
AC062021.1	ETNPPL
ZDHHC22	SOX8
RASL10A	CHGB
CRTAC1	GPR17
LPPR3	ELFN2
VIPR2	JPH3
CHGA	SH3GL2
SVOP	FERMT1
ACTL6B	CPLX2
ELFN2	SNAP91
SFRP2	RASL10A
GPR17	ATCAY
KLRC2	TMEM100
GDAP1L1	CSDC2
ATCAY	SCG3
KCNIP2	KCNIP2
RP11-231C18.1	BMP2
LUZP2	GABBR1
RP5-1119A7.17	SPHKAP
CHGB	RPRM
RPRM	SEZ6L
CDR1	HPSE2
VSTM2A	DSCAML1
PCDH15	PLPPR1
HMX1	SCRT1
SOX8	KLRC2
ENHO	JPH4
SNAP91	DUSP26
SCRT1	NOG
SCG3	USH1C
RP11-161M6.2	CHGA
ABCC8	CDHR1
GABRB3	GRIN1
KCNIP3	VIPR2
SLC25A48	KCNIP3
SH3GL2	GRIA2
C5orf38	DAAM2
MIR219-2	DLL1
GALNT13	LUZP2
RUNDC3A	MMD2
BTBD17	PRLHR
SEZ6L	PTPRT
FERMT1	RUNDC3A
ATP1A3	CA10
SCN3B	GDAP1L1
CPLX1	PHYHIPL
CA10	SLIT1
HES5	RCOR2
ARPP21	GRIA4
NEU4	ACTL6B
NRXN1	CALN1
ATOH8	ZNF488
SLIT1	ATP1A3
CDHR1	SELL
FAM163B	PSD
MMD2	AMER2
CSDC2	GFRA1
DUSP26	ENHO
SNX22	NMNAT2
PDE2A	TMEM151B
ALDOC	ATP6V1G2
USH1C	TNK2
LPPR1	KCNJ9
JPH4	ALDOC
ST8SIA3	SCN3B
LINC00925	H2AFY2
RP11-284F21.7	GABRB3
NDRG2	TUB
LINC00599	PDE2A
HES6	ABCC8
LINC00844	SHISA7
CABP1	KCNB1
TTC9B	SPTBN2
TMEM151B	KIF21B
WNT7B	BRINP1
NOG	KCNJ11
RTN1	GABRG1
CCK	DLGAP1
RGR	RAPGEF4
LINC00689	CPLX1
BCAN	SSTR1
TUB	NRSN1
CKMT1A	PCDH15
FAM57B	ASIC4
DDN	GABRA3
SNAP25	RTN1
HRH3	PDZD4
GALNT9	ARPP21
SLC1A6	MYT1
FCGR3A	G0S2
CAPG	EMP1
PLAUR	HLA-DQB1
CCDC109B	CA3
ADM	TGFBI
BGN	C1S
MRC2	CFI
TUBA1C	BGN
ACTN1	RNASE2
S100A8	HLA-DQA1
MSN	MOXD1
STEAP3	EFEMP2
C3	TNC
HSPB1	CD248
MMP14	PLA2G2A
GBP2	SOD2
HLA-DPA1	APOL4
SRPX2	ADM
SOD2	CD44
MAOB	CCL2
FCGBP	PDLIM1
TYMP	PLEKHA4
PLAT	S100A10
RARRES2	PLAT
IGLC1	MCUB
IFITM3	SERPINA1
SLN	IL13RA2
S100A6	LYZ
CP	GBP1
CD44	GPNMB
TNC	MMP9
PDLIM1	PTX3
MS4A6A	HLA-DRB5
IGHA1	COL1A2
LGALS1	TUBA1C
CFI	SERPINH1
IGHG2	S100A6
FN1	PLAU
RBP1	RAB34
OCIAD2	CAPG
HLA-DRA	SEC61G
PLP2	MSN
SERPINH1	SRPX2
TGFBI	MEOX2
SERPING1	LGALS1
CLIC1	MAOB
MGP	SAA1
CCL2	IGFBP3
VEGFA	OCIAD2
PLAU	PDLIM4
HSPA7	ALOX5AP
GDF15	HLA-DPA1
COL1A2	STEAP3
GPNMB	HLA-DPB1
S100A10	CXCL10
IGLC3	CD74
AEBP1	AQP1
TAGLN2	COL6A2
PDLIM4	CD163
LGALS3	C1R
ABCC3	LGALS3
COL6A2	SPOCD1
POSTN	MGP
CD163	RARRES2
LINC00152	SERPING1
IGFBP3	S100A9
IFI30	COL1A1
S100A4	HLA-DRB1
SAA1	FCGR3A
S100A11	PLP2
SOCS3	POSTN
PLA2G2A	COL4A2
MIR4435-1HG	FMOD
VIM	RBP1
PLEKHA4	AEBP1
C1R	S100A11
SPP1	COL3A1
SERPINE1	CLIC1
COL4A2	S100A4
COL4A1	FCGBP
FABP5	TAGLN2
COL3A1	SOCS3
MMP9	VIM
IGHG1	FABP5
IGKC	ANXA2
COL1A1	HLA-DRA
PDPN	NNMT
ANXA2	COL4A1
TNFRSF12A	SPP1
EMP3	SERPINE1
NNMT	TNFRSF12A
ANXA1	ANXA1
SPOCD1	LTF
LTF	CHI3L2
METTL7B	PDPN
SERPINA3	EMP3
IGFBP2	IGFBP2
CHI3L2	METTL7B
TIMP1	TIMP1
CHI3L1	CHI3L1
